# Supplementary material
Source: HighWire-hosted journal article supplement (https://heartasia.bmj.com/content/10/1/e010980)
Supplement: inline-supplementary-material-1 [file inline-supplementary-material-1.docx]

Supplementary Table 1. NOS risk of bias scale for included cohort studies

|  |  | Selection |  |  |  |  | Outcome |  |  |
| --- | --- | --- | --- | --- | --- | --- | --- | --- | --- |
| Studies | Representativeness of the exposed cohort | Selection of the non-exposed cohort | Ascertainment of exposure | Outcome of interest not present at start of study | Comparability | Assessment of outcome | Adequacy of duration of follow-up | Adequacy of completeness of follow-up | Total score  (0-9) |
| Schmid 2017 | 1 | 0 | 1 | 1 | 0 | 1 | 1 | 1 | 6 |
| Stundl 2017 | 1 | 0 | 1 | 1 | 1 (age) | 1 | 1 | 1 | 7 |
| Wernly 2017 | 1 | 0 | 1 | 0 | 1 (age) | 1 | 1 | 1 | 6 |
| Lindman 2015 | 1 | 0 | 1 | 1 | 0 | 1 | 1 | 1 | 6 |
